# Supplementary material
Source: MDPI journal article supplement (https://www.mdpi.com/2076-0760/12/12/648)
Supplement: s1 [file s1]

## **Semi-Structured Interview (Patient)**

### **STEP 1: Understanding data prior to visualization**

- Can you explain to me what data mindLAMP collects?
- Is there anything about your mood, behavior, or environment that you have learned from your time using mindLAMP?

### **STEP 2: Opinion of data visualization**

Now we will show you visualizations of all your data that has been collected on mindLAMP throughout your time in the clinic. We want to hear your opinion and suggestions, so please share any thought.

- Overall, did you understand what the visualizations were illustrating?
- Did you find the visualizations of your data meaningful and useful?
- Which visualization was most valuable/relevant to you?
- Do you feel that the visualizations give an accurate representation of your behavioral patterns or how you felt?
- Did seeing your own data make you more comfortable with the idea of having your data collected?
- Out of all the visualizations, did you feel that any were irrelevant or had no benefit? If so, which?
- Do you feel that the visualizations added to your experience at the clinic?
- Overall, how would you rate the visualizations in terms of usability?
- Can we improve the visualization in any way?
- Do you have any questions about any of these visualizations?

### **STEP 3: Personal wellness goal**

During your time in the clinic, what was your personal wellness goal.

- Tell me about your experience working towards this goal throughout the digital clinic.
- How did the digital clinic impact your experience working towards this goal?
- Did having a specific goal improve your experience? Why or why not?
- Did you meet your expectations, why or why not?

### **STEP 4: Conclusion**

- Is there anything else that you would like to share?

## **Semi-Structured Interview (Clinician)**

### **STEP 1: Opinion of data visualization**

- Overall, did you understand what the visualizations were illustrating?
- How did the visualizations augment patient care, if at all?
- How often did you mention or utilize the visualizations in session, on average, if at all?
- Did the visualizations provide any new insights?
- Do you feel that the visualizations give an accurate representation of your patient's functioning?
- Overall, how would you rate the visualizations in terms of usability?

### **STEP 2: Opinion of personal goals**

- Describe your opinion on patients setting personal goals.
- What was your experience with patients' personal goals in the digital clinic?
- How could personal goals be incorporated into care?

### **STEP 3: Conclusion**

- Is there anything else you would like to add?
