# Supplementary material
Source: MDPI journal article supplement (https://www.mdpi.com/2076-0760/12/12/648)
Supplement: s1 [file s1]

# Graph Literacy Questionnaire

This survey is designed to assess your ability and comfort in interpreting graphs.

\* Indicates required question

1. Identifier Number (**Ask the Research Assistant on the call for this number**) \*

Please type this in number format (i.e. respond with **0** instead of **zero**)

\_\_\_\_\_

2. 1. The graph below shows that over the course of the week, as Screen Duration is decreasing, Anxiety values are \_\_\_\_.

\*

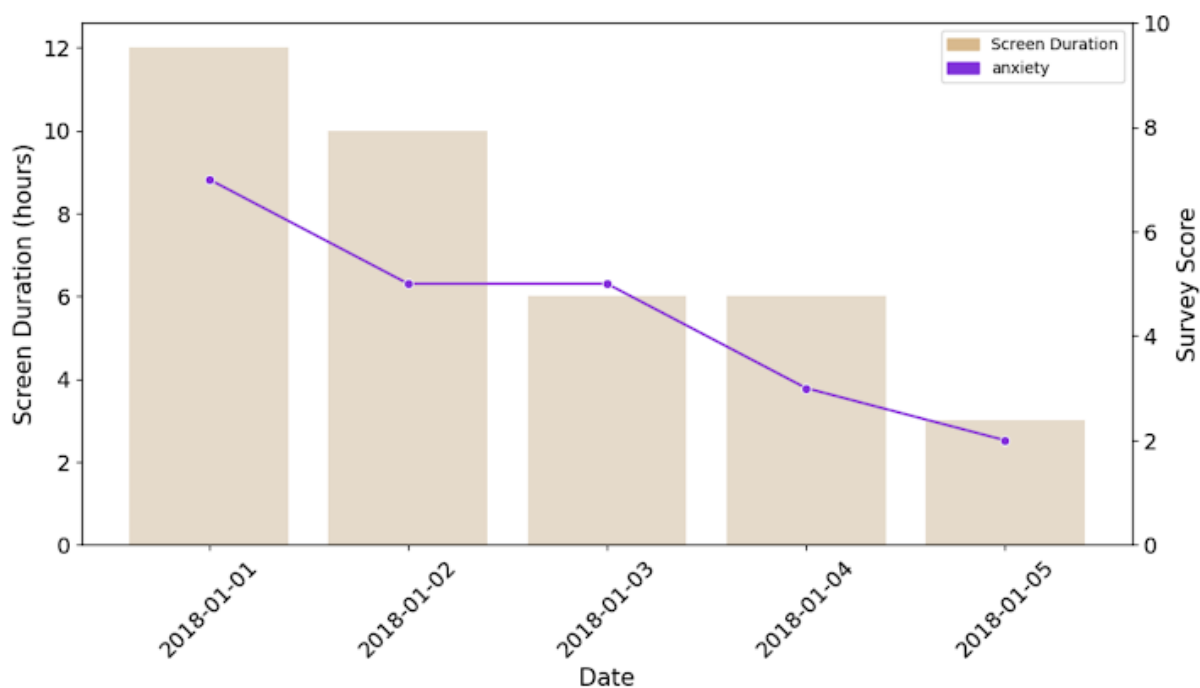

Mark only one oval.

- ☐ Increasing
- ☒ Decreasing
- ☐ Staying the same

3. 2. What Anxiety survey score was reported on January 2nd, 2018? \*

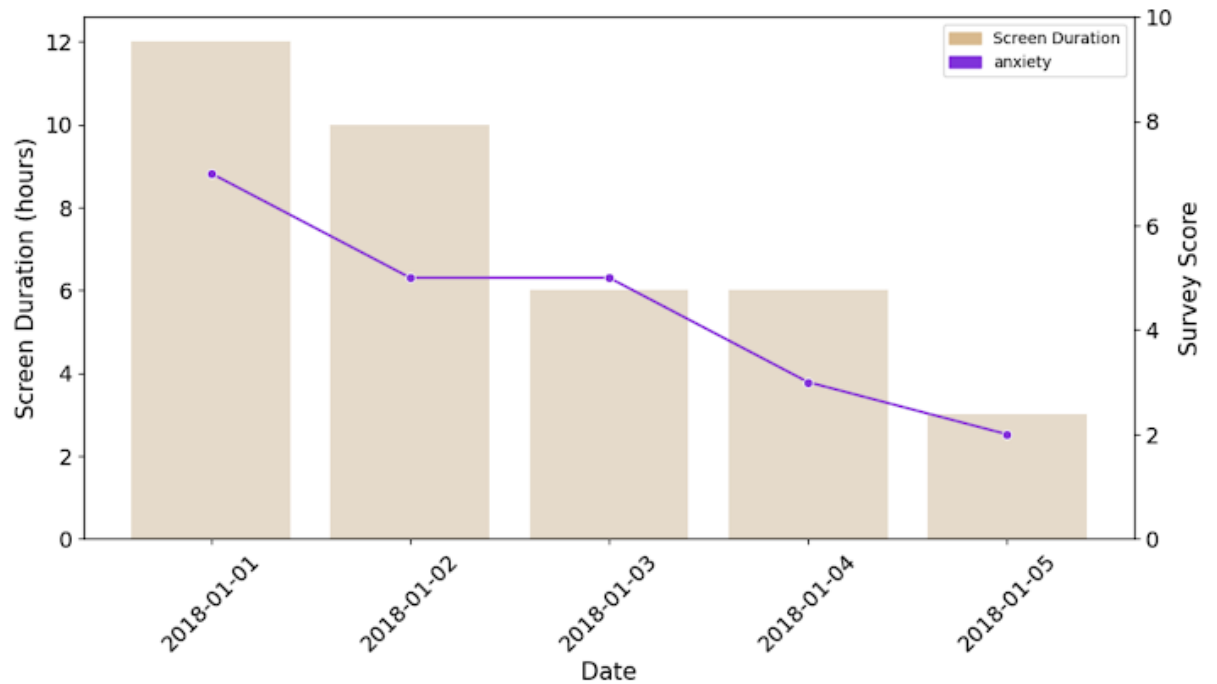

Mark only one oval.

- ☐ 2
- ☒ 5
- ☐ 8
- ☐ 10

4. 3. On what day does the graph show the highest amount of Screen Duration? \*

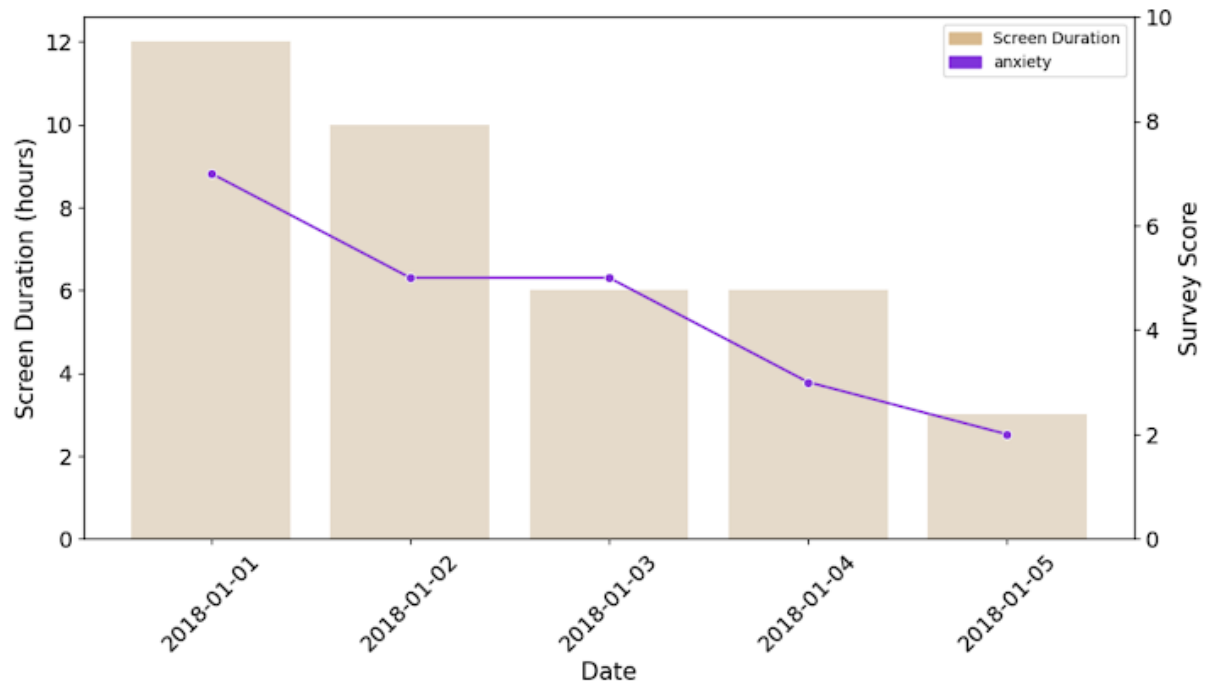

Mark only one oval.

- ☒ 01/01/2018
- ☐ 01/03/2018
- ☐ 01/05/2018

5. 4. In general, as Depression scores are decreasing, what is happening to Anxiety scores? \*

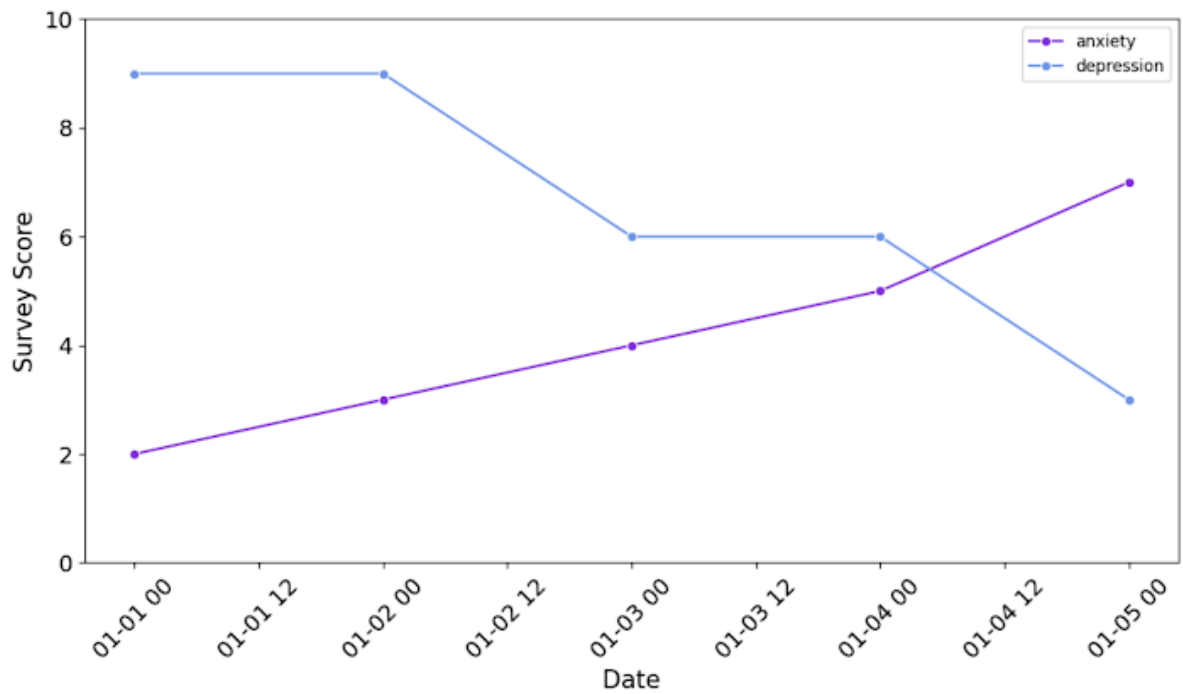

Mark only one oval.

- ☒ They are increasing
- ☐ They are decreasing
- ☐ They are staying the same

6. 5. Are Dysfunction scores higher or lower in the Interim Survey compared to the Intake? \*

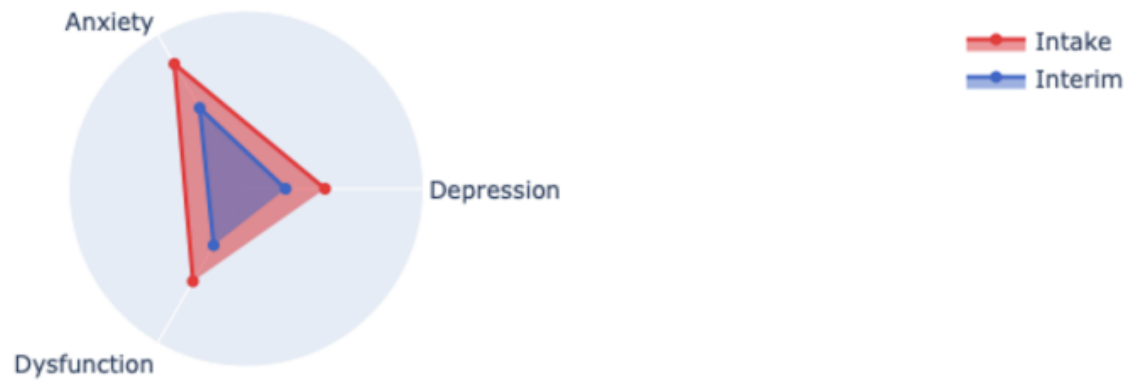

Mark only one oval.

☐ Higher

☐ Lower

7. 6. The calendar below shows Data Quality scores for several weeks during February and March of 2023. The bar on the right shows a color key for the Data Quality values. \*

On the **first Monday in February**, what is the Data Quality score?

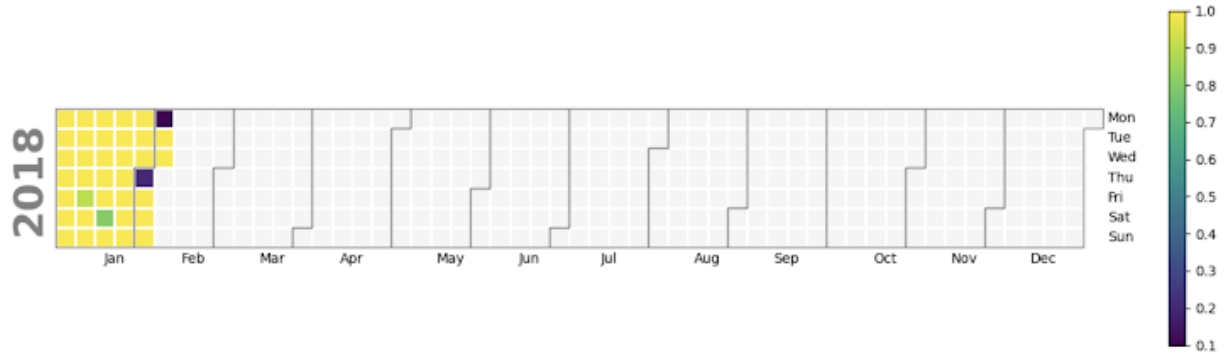

Mark only one oval.

- ☐ 1
- ☐ Between 0.8 and 1
- ☐ Between 0.6 and 0.8
- ☐ Between 0.4 and 0.6
- ☒ Less than 0.4

This content is neither created nor endorsed by Google.

Google Forms
